# Supplementary material
Source: publisher figshare collection journal article supplement (https://sage.figshare.com/ndownloader/files/17855360)
Supplement: Supplementary file 1 [file 17855360]

## Official data sources

Government of Finland proposal for the Parliament as the Act on the secondary use of social and health information, and as other adjacent laws. HE 159/2017 vp.

KELA (2016). Official response on 28.9.2016 to the Ministry of Social and Welfare Affairs request for comment on 15.8.2016 (diary number STM011:00/2015).

Ministry of Social Affairs and Health (2014). Decision of the Minister of Basic Services 1.4.2015, nomination decision: "Working group preparing the legislation on the secondary use of social and welfare services customer and patient data" (STM011:00/2015).

Ministry of Social Affairs and Health (2014). Information as the basis for welfare and transforming services - Making use of social and welfare data -strategy". Juvenes Print Oy. Tampere. ISBN 978-952-00-3548-8

Ministry of Social Affairs and Health (2015). Memorandum on the meeting and workshop of the legislative expert group on 20.10.2015: "The perspective of users and developers".

Ministry of Employment and Economy (2014). Growth strategy for research and innovation in the health sector. Reports of the Ministry of Employment and Economy 12/2014. Helsinki.

Office of the Chancellor of Justice (2014). Decision of the Deputy Chancellor of Justice diary number OKV 628/1/2012 "Legal propriety of personal information registers".

Statistics Finland (2016). Official response (diary number TK-01-1144-16) on 30.9.2016 to the Ministry of Social and Welfare Affairs request for comment on 15.8.2016 (diary number STM011:00/2015).
